# Supplementary material for: Flublok Quadrivalent Vaccine Adjuvanted with R-DOTAP Elicits a Robust and Multifunctional CD4 T Cell Response That Is of Greater Magnitude and Functional Diversity Than Conventional Adjuvant Systems
Source: MDPI journal article supplement (doi:10.3390/vaccines12030281), 2024-03-07
Supplement: s1 [file s1]

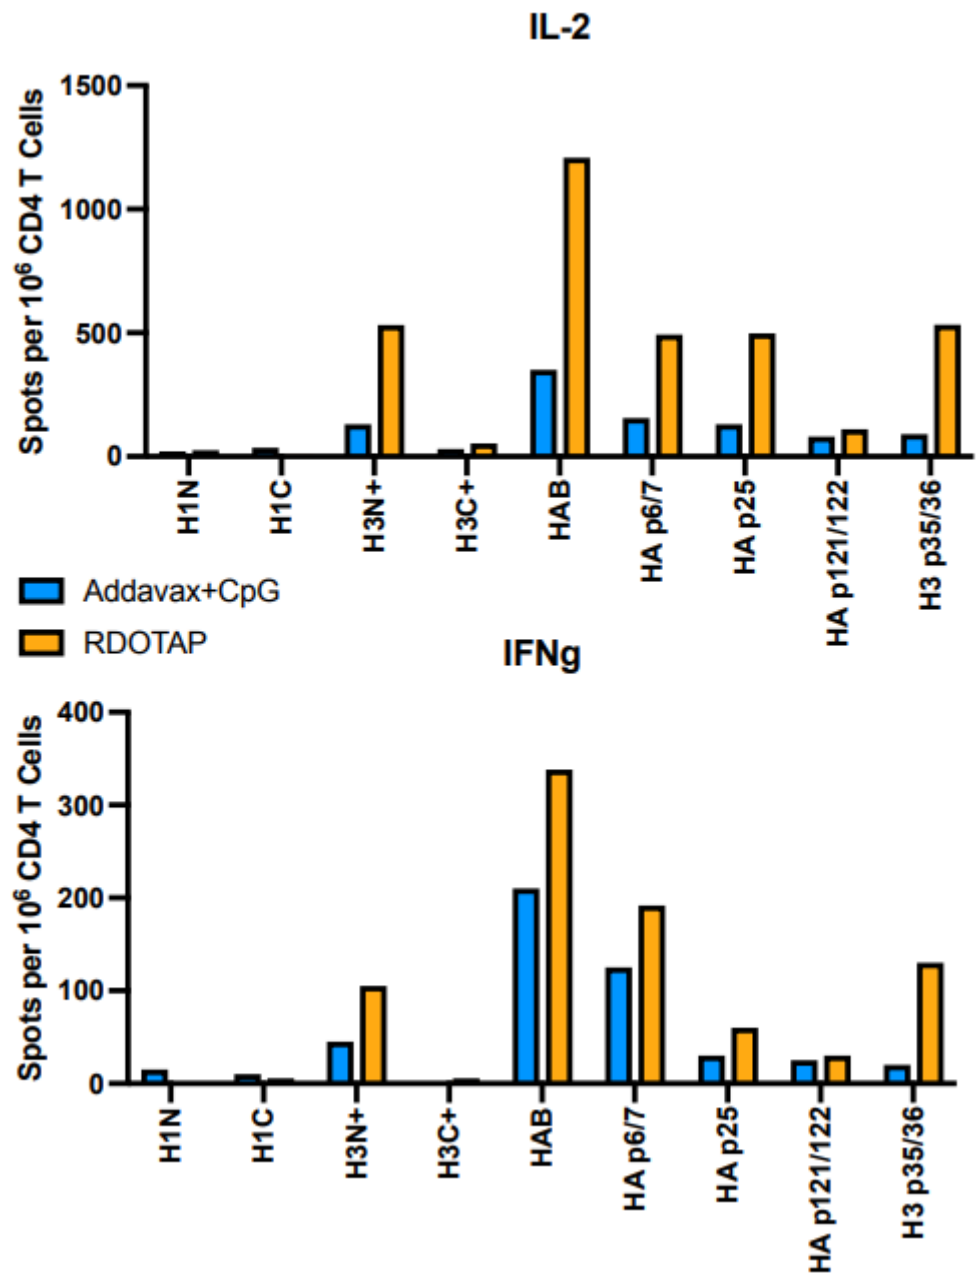

**Figure S1.** CD4 T cell repertoire post vaccination with Flublok with R-DOTAP or AddaVax/CpG. Different cohorts of mice were vaccinated with Flublok adjuvanted with Addavax + CpG (blue) or R-DOTAP (orange). Elicited CD4 T cells specific for pools of peptides for H1, H3 and HA -B or individual peptide epitopes identified H3 (as indicated below each panel) were quantified by IL -2 (top panel) and IFN - g (bottom panel) EliSpot assays. Shown is the frequency of cytokine producing per million CD4 T cells from the draining popliteal lymph nodes nine days post vaccination from pooled mice from a representative experiment.

A.

| Antibody     | Fluorophore     | Clone      | Company    | Catalogue #  |
|--------------|-----------------|------------|------------|--------------|
| IL-17a       | BUV395          | TC11-18H10 | BD         | 565246       |
| CD4          | BUV805          | RM4-5      | BD         | 741912       |
| IL-4         | BV421           | 11B11      | BD         | 562915       |
| IL-5         | BV421           | TRFK5      | BioLegend  | 504311       |
| CD3 (CD3e)   | BV480           | 145-2C11   | BD         | 746368       |
| IFN $\gamma$ | BV786           | XMG1.2     | BD         | 563773       |
| GrzB         | FITC            | GB11       | BioLegend  | 515403       |
| CD8a         | PerCP-Cy5.5     | 53-6.7     | BioLegend  | 100734       |
| CD107a       | PerCP-eFluor710 | 1D4B       | Invitrogen | 46-1071-82   |
| B220         | PE-Cy5          | RA3-6B2    | BioLegend  | 103210       |
| IL-2         | PE-Cy7          | JES6-5H4   | BioLegend  | 503831       |
| CD44         | APC-Cy7         | IM7        | TONBO      | 25-0441-U100 |

B.

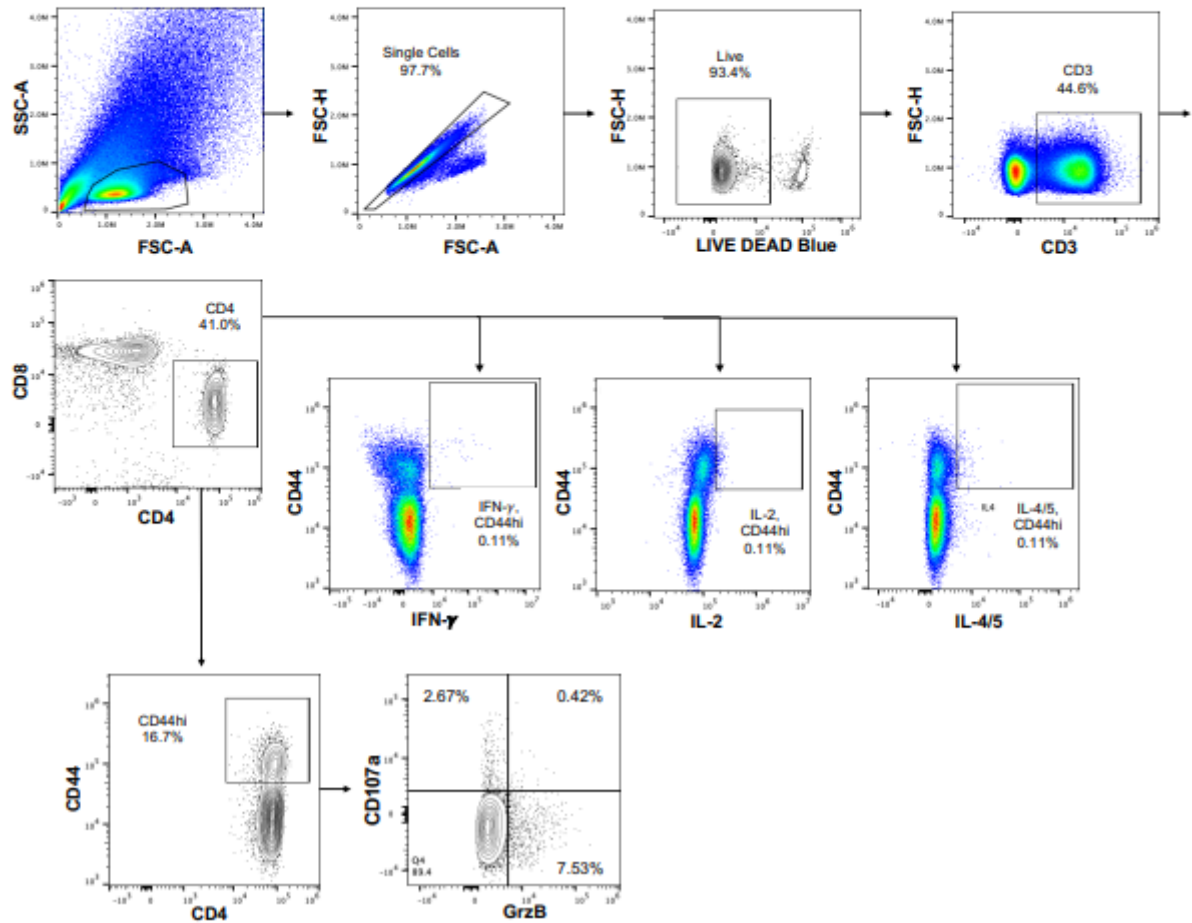

**Figure S2.** Flow Cytometry panel and representative gating scheme (A) All fluorescently conjugated antibodies utilized in the flow cytometry experiments, with catalogue numbers, have been tabulated here. (B) The following gating strategy was utilized to identify populations of antigen-reactive CD4 T cells. The analysis began by first gating on the lymphocyte population, followed by the exclusion of doublet cells. Live cells were then evaluated for their expression of CD3 and subsequently CD4. Antigen experienced, cytokine producers were identified by the co-expression of CD44 and either IFN- $\gamma$ , IL-2 or IL-4/5. Of note, IL-4 and IL-5-targeting antibodies were conjugated to the same fluorophore, BV421. This allowed us to capture any cells that expressed either cytokine, or both cytokines, in a single gate. CD4 T cells with cytolytic potential were determined by first gating on the antigen-experienced population, defined as CD4<sup>+</sup>, CD44<sup>hi</sup>. These cells were then partitioned via quadrant gating to determine their expression of GrzB, CD107a or both.
